# Supplementary material
Source: publisher figshare collection journal article supplement (https://brill.figshare.com/articles/dataset/_/21723797)
Supplement: Supplementary file 1 [file 1]

# **Updating the taxonomy, phylogeny and biogeography of the aberrant genus *Coenosopsia* Malloch (Diptera: Anthomyiidae)**

**Lucas Roberto Pereira Gomes\* and Claudio José Barros de Carvalho**

Laboratório de Biodiversidade e Biogeografia de Diptera, Departamento de Zoologia,  
Universidade Federal do Paraná, C.P. 19020, 81531–980, Curitiba, PR, Brazil

\*Corresponding author; e-mail: [lucaspergos@gmail.com](mailto:lucaspergos@gmail.com)

ORCID [i](#)IDs: Gomes: 0000-0002-4782-2015; de Carvalho: 0000-0002-3533-6853

**Supplementary material**

**Table S1.** List of material examined for the phylogenetic analysis.

| Family       | Species                                                 | Label information                                                                                                                |
|--------------|---------------------------------------------------------|----------------------------------------------------------------------------------------------------------------------------------|
| Anthomyiidae | <i>Anthomyia pluripunctata</i> (Albuquerque, 1959)      | Brazil, Santa Catarina, Nova Teutônia, v.1970, F. Plaumann, 1♂; viii.1967, 1♀ (MZUSP)                                            |
| Anthomyiidae | <i>Calythea comis</i> (Stein, 1911)                     | Chile, Valparaíso, x.1969, L. Peña, 2♂♂ and 2♀♀ (MZUSP)                                                                          |
| Anthomyiidae | <i>Coenosopsia albuquerquei</i> Bortolanza et al., 2006 | Brazil, Paraná, Telêmaco Borba, 25.vii.1988, Lev. Ent. PROFAUPAR, 1♂ (Holotype) (DZUP); 24.vii.1987, 1♀ (DZUP)                   |
| Anthomyiidae | <i>Coenosopsia azteca</i> sp. nov.                      | Mexico, Morelos, 8. xii.1978, J. Butze, 1♂ (Holotype) (CNIN).                                                                    |
| Anthomyiidae | <i>Coenosopsia brasiliensis</i> Michelsen, 1991         | Brazil, Rio de Janeiro, Serviço Febre Amarela M. E. S. Bras., x.1938, 1♂ (Holotype) (MNRJ) and 1♀ (Paratype) (MNRJ)              |
| Anthomyiidae | <i>Coenosopsia ferrari</i> Nihei & de Carvalho, 2004    | Brazil, Distrito Federal, 9.xii.1997, I. R. Diniz, 1♂ (Holotype) (DZUP) and 1♀ (Paratype) (DZUP)                                 |
| Anthomyiidae | <i>Coenosopsia floridensis</i> Michelsen, 1991          | Mexico, Veracruz, Est. Biol. Los Tuxtlas, A. Ibarra et al., 17-18.iv.1986, 1♂ (CNIN); Córdoba, L. Delgado, 17.ii.1999, 1♀ (IEXA) |
| Anthomyiidae | <i>Coenosopsia limeirai</i> sp. nov.                    | Brazil, Ceará, Parque Nac. de Ubajara, 18-30.xi.2012, F. Limeira-de-Oliveira, et al., 1♂ (Holotype) (CZMA); 1♀ (Paratype) (CZMA) |
| Anthomyiidae | <i>Coenosopsia mexicana</i> Michelsen, 1991             | Mexico, Veracruz. Coatepec, S. Ibañez & F. A. Pech, 19.iii.2004, 1♂ and 2♀♀ (IEXA)                                               |
| Anthomyiidae | <i>Coenosopsia michelseni</i> Nihei & Carvalho, 2004    | Brazil, Distrito Federal, 13.v.1997, I. R. Diniz, 1♂ (Holotype) (DZUP) and 1♀ (Paratype) (DZUP)                                  |
| Anthomyiidae | <i>Coenosopsia peruviana</i> Michelsen, 1991            | Brazil, Amazonas, Autaz-Mirim, 26.viii.1994, J. Vidal, 1♂ (INPA); Manaus, 09-16.iii.1989, Y. Camara & J. E. Binda, 1♀ (INPA)     |
| Anthomyiidae | <i>Coenosopsia prima</i> Malloch, 1924                  | Costa Rica. Puntarenas, M. Lobo, 3-6.v.1998, 1♂ (INBIO); Panama, Canal Zone, 9.iii.1967, Roger D. Akre, 1♀ (Paratype) (WSU)      |
| Anthomyiidae | <i>Coenosopsia ribeiroi</i> sp. nov.                    | Brazil, Rio Grande do Sul, Arroio Grande, 30.viii.2002, P. B. Ribeiro, 1♂ (Holotype) (DZUP); 1♀ (Paratype) (DZUP)                |

|                |                                                     |                                                                                                                       |
|----------------|-----------------------------------------------------|-----------------------------------------------------------------------------------------------------------------------|
| Anthomyiidae   | <i>Delia platura</i> (Meigen, 1826)                 | England, Oxford, Burgess Field Park, 23.viii.2003, S. S. Nihei, 2♂♂; Oxon, Henley, 18.vi.1992, C. Carvalho, 1♀ (DZUP) |
| Anthomyiidae   | <i>Fucellia tergina</i> (Zetterstedt, 1845)         | Brazil, Rio de Janeiro, Angra dos Reis, H. S. Lopes, 23.vi.1972, 2♂♂; 27.vi.1972, 2♀♀ (DZUP)                          |
| Anthomyiidae   | <i>Hydrophoria ruralis</i> (Meigen, 1826)           | England, Oxford, Brasenose Wood, 14.ix.2003, S. S. Nihei, 1♂ (DZUP)                                                   |
| Anthomyiidae   | <i>Leucophora maculipennis</i> (Albuquerque, 1953)  | Brazil, Paraná, São José dos Pinhais, 04.xi.1986, Lev. PROFAUPAR, 1♂; 31.x.1986, 1♀ (DZUP)                            |
| Anthomyiidae   | <i>Pegomya poeciloptera</i> Malloch, 1921           | Brazil, Rio Grande do Sul, Morro Redondo, 26.vii.2002, R. F. Krüger, 1♂ (DZUP); 09.v.2003, 1♀ (DZUP)                  |
| Anthomyiidae   | <i>Phaonantho benevola</i> Couri, 1979              | Brazil, Mato Grosso, Sinop, x.1976, Alvarenga & Roppa, 1♂ (Holotype) (MNRJ); x.1975, 1♀ (Paratype) (MNRJ)             |
| Anthomyiidae   | <i>Phaonantho mallochi</i> (Curran, 1934)           | Brazil, Paraná, Jundiá do Sul, 16.xi.1987, 1♂ (DZUP); 03.xi.1986, 1♀ (DZUP)                                           |
| Anthomyiidae   | <i>Phaonantho sordilloae</i> Pamplona & Couri, 1993 | Brazil, Rio de Janeiro, xi.1988, C. M. O. Sordillo, 1♂ (Holotype) (MNRJ); 1♀ (Paratype) (MNRJ)                        |
| Scathophagidae | <i>Scathophaga stercoraria</i> (Linnaeus, 1758)     | England, Oxford, 20.xii.1984, C. Elias, 1♂ and 1♀ (DZUP)                                                              |

---

**Table S2.** Matrix of characters of *Coenosopsia* species and outgroup. Non-applicability of characters to taxa is indicated by “–”.

| Species                         | 000000000111111111222222222233333333444    |
|---------------------------------|--------------------------------------------|
|                                 | 123456789012345678901234567890123456789012 |
| <i>Scathophaga stercoraria</i>  | 100010110101100100101020–20–0020–010100010 |
| <i>Anthomyia pluripunctata</i>  | 110110010010112010101121100–0010–10–000110 |
| <i>Calythea comis</i>           | 00110–0100100111100–1311110–0010–010000111 |
| <i>Delia platura</i>            | 0010100100110011100–1121010–0000–00–000010 |
| <i>Fucellia tergina</i>         | 0011101101310021000–1021720–0010–00–001010 |
| <i>Hydrophoria ruralis</i>      | 211010010011013010111221010–0000–010100110 |
| <i>Leucophora maculipennis</i>  | 20111200–0310011100–1121620–0000–00–001010 |
| <i>Pegomya poeciloptera</i>     | 010010011010113110101111620–0010–010000110 |
| <i>Phaonantho benevola</i>      | 22101101101001101111031122100100–111001000 |
| <i>Phaonantho mallochi</i>      | 22101101100001111011031122100110–111001000 |
| <i>Phaonantho sordilloae</i>    | 22101101102001101111032122100120–111001000 |
| <i>Coenosopsia albuquerquei</i> | 221110110111011100110201301310110010111010 |
| <i>Coenosopsia azteca</i>       | 221110110101011100110201401211011010101010 |
| <i>Coenosopsia brasiliensis</i> | 221110110121011100110201401111010010001011 |
| <i>Coenosopsia ferrari</i>      | 221110110111011100110201301310110010011010 |
| <i>Coenosopsia floridensis</i>  | 221110110121011100110201401212211010101010 |
| <i>Coenosopsia limeirai</i>     | 221110110121011100110201501411010010101011 |
| <i>Coenosopsia mexicana</i>     | 221110110101011100110201401212211010101010 |
| <i>Coenosopsia michelseni</i>   | 221110110121011100110201411212111010101010 |
| <i>Coenosopsia peruviana</i>    | 221110110121011100110201401111010010101011 |
| <i>Coenosopsia prima</i>        | 221110110111011100110201411111011010101010 |
| <i>Coenosopsia ribeiroi</i>     | 221110110111011100110201411111110010111010 |

**Table S3.** Values of the constant of concavity ( $k$ ) applied in the analysis with implied weighting with their respective number of steps (L), consistency index (IC), retention index (IR), fit value and number of trees generated.

| <b>k</b> | <b>L</b> | <b>IC</b> | <b>IR</b> | <b>fit</b> | <b>trees</b> |
|----------|----------|-----------|-----------|------------|--------------|
| -        | 116      | 55        | 75        | 29.59405   | 1            |
| 1        | 118      | 54        | 74        | 23.60833   | 2            |
| 2        | 117      | 54        | 74        | 27.40794   | 1            |
| 3        | 117      | 54        | 74        | 29.66071   | 1            |
| 4        | 117      | 54        | 74        | 31.14618   | 1            |
| 5        | 117      | 54        | 74        | 32.20833   | 1            |
| 6        | 116      | 55        | 75        | 32.01212   | 1            |
| 7        | 116      | 55        | 75        | 33.64755   | 1            |
| 8        | 116      | 55        | 75        | 34.15853   | 1            |
| 9        | 116      | 55        | 75        | 34.57887   | 1            |
| 10       | 116      | 55        | 75        | 34.93103   | 1            |
| 15       | 116      | 55        | 75        | 36.08516   | 1            |
| 20       | 116      | 55        | 75        | 36.72667   | 1            |
| 30       | 116      | 55        | 75        | 37.42001   | 1            |
| 60       | 116      | 55        | 75        | 38.17399   | 1            |
